# Supplementary material
Source: PubMed Central journal article supplement (PMC6556771)
Supplement: NIHMS1525748-supplement-2.pdf [file NIHMS1525748-supplement-2.pdf]

## Reporting Summary

Nature Research wishes to improve the reproducibility of the work that we publish. This form provides structure for consistency and transparency in reporting. For further information on Nature Research policies, see [Authors & Referees](#) and the [Editorial Policy Checklist](#).

### Statistical parameters

When statistical analyses are reported, confirm that the following items are present in the relevant location (e.g. figure legend, table legend, main text, or Methods section).

n/a Confirmed

- The exact sample size ( $n$ ) for each experimental group/condition, given as a discrete number and unit of measurement
- An indication of whether measurements were taken from distinct samples or whether the same sample was measured repeatedly
- The statistical test(s) used AND whether they are one- or two-sided  
*Only common tests should be described solely by name; describe more complex techniques in the Methods section.*
- A description of all covariates tested
- A description of any assumptions or corrections, such as tests of normality and adjustment for multiple comparisons
- A full description of the statistics including central tendency (e.g. means) or other basic estimates (e.g. regression coefficient) AND variation (e.g. standard deviation) or associated estimates of uncertainty (e.g. confidence intervals)
- For null hypothesis testing, the test statistic (e.g.  $F$ ,  $t$ ,  $r$ ) with confidence intervals, effect sizes, degrees of freedom and  $P$  value noted  
*Give  $P$  values as exact values whenever suitable.*
- For Bayesian analysis, information on the choice of priors and Markov chain Monte Carlo settings
- For hierarchical and complex designs, identification of the appropriate level for tests and full reporting of outcomes
- Estimates of effect sizes (e.g. Cohen's  $d$ , Pearson's  $r$ ), indicating how they were calculated
- Clearly defined error bars  
*State explicitly what error bars represent (e.g. SD, SE, CI)*

*Our web collection on [statistics for biologists](#) may be useful.*

### Software and code

Policy information about [availability of computer code](#)

Data collection

RNA-seq, CHIP-seq, ATAC-seq, and sc-RNA-seq data was collected by Illumina NextSeq 500 sequencer. Confocal images of embryoid bodies and neurons were taken by Leica SP5 Confocal microscope. Live Acquisition software package (Till Photonics) was used to collect calcium imaging data.

## Data analysis

SeqUnwinder Kakumanu et al., 2017  
 GREAT McLean et al., 2010  
 MultiGPS Mahony et al., 2014  
 DNAShapeR Chiu et al., 2016  
 Bowtie Langmead et al., 2009  
 DESeq2 Love et al., 2014  
 Tophat Kim et al., 2013  
 Rsubread Liao et al., 2013  
 Matlab- MATLAB and Statistics Toolbox Release 2012b, The MathWorks, Inc., Natick, Massachusetts, United States.  
 Panther (version 13.1) - <http://pantherdb.org>  
 Bedtools - Quinlan et al., 2016  
 EdgeR - Robinson et al. 2009  
 RefSeq - O'Leary et al. 2016

For manuscripts utilizing custom algorithms or software that are central to the research but not yet described in published literature, software must be made available to editors/reviewers upon request. We strongly encourage code deposition in a community repository (e.g. GitHub). See the Nature Research [guidelines for submitting code & software](#) for further information.

## Data

Policy information about [availability of data](#)

All manuscripts must include a [data availability statement](#). This statement should provide the following information, where applicable:

- Accession codes, unique identifiers, or web links for publicly available datasets
- A list of figures that have associated raw data
- A description of any restrictions on data availability

All data produced for this study are available under GSE114176.

## Field-specific reporting

Please select the best fit for your research. If you are not sure, read the appropriate sections before making your selection.

Life sciences  Behavioural & social sciences  Ecological, evolutionary & environmental sciences

For a reference copy of the document with all sections, see [nature.com/authors/policies/ReportingSummary-flat.pdf](https://www.nature.com/authors/policies/ReportingSummary-flat.pdf)

## Life sciences study design

All studies must disclose on these points even when the disclosure is negative.

|                 |                                                                                                                                                                                                                                                                                                                                                                                                                                                                                                                                                                                                                                                                                                                                              |
|-----------------|----------------------------------------------------------------------------------------------------------------------------------------------------------------------------------------------------------------------------------------------------------------------------------------------------------------------------------------------------------------------------------------------------------------------------------------------------------------------------------------------------------------------------------------------------------------------------------------------------------------------------------------------------------------------------------------------------------------------------------------------|
| Sample size     | No statistical methods were used to pre-determine sample sizes but our sample sizes are similar to those reported in previous publications (Velasco et al., 2017; Mazzoni et al., 2013). Biologically independent cell differentiations were used as replicates. We used 3 independent biological replicates (n=3) for Ascl1 and Neurog2 ChIP-seq experiments. The rest of the ChIP-seq experiments, all ATAC-seq experiments, antibody stainings, and calcium imaging were performed in 2 independent biological replicates. Most of the RNA-seq experiments were performed in 2 biological replicates except iAscl1 48 (n=5) and EB t0 (n=5) because of the availability of additional replicates performed in the past for other studies. |
| Data exclusions | None                                                                                                                                                                                                                                                                                                                                                                                                                                                                                                                                                                                                                                                                                                                                         |
| Replication     | All attempts at replication were successful. For all experiments, replication was achieved through multiple independent cell differentiations.                                                                                                                                                                                                                                                                                                                                                                                                                                                                                                                                                                                               |
| Randomization   | Experiments were not randomized and we did not perform any in vivo studies. We compared control and test samples through treatment and genetic information.                                                                                                                                                                                                                                                                                                                                                                                                                                                                                                                                                                                  |
| Blinding        | The blinding of investigators were not performed but different people analyzed the same data.                                                                                                                                                                                                                                                                                                                                                                                                                                                                                                                                                                                                                                                |

## Reporting for specific materials, systems and methods

## Materials &amp; experimental systems

| n/a                                 | Involvement                         | Involved in the study       |
|-------------------------------------|-------------------------------------|-----------------------------|
| <input checked="" type="checkbox"/> | <input type="checkbox"/>            | Unique biological materials |
| <input type="checkbox"/>            | <input checked="" type="checkbox"/> | Antibodies                  |
| <input type="checkbox"/>            | <input checked="" type="checkbox"/> | Eukaryotic cell lines       |
| <input checked="" type="checkbox"/> | <input type="checkbox"/>            | Palaeontology               |
| <input checked="" type="checkbox"/> | <input type="checkbox"/>            | Animals and other organisms |
| <input checked="" type="checkbox"/> | <input type="checkbox"/>            | Human research participants |

## Methods

| n/a                                 | Involvement                         | Involved in the study  |
|-------------------------------------|-------------------------------------|------------------------|
| <input type="checkbox"/>            | <input checked="" type="checkbox"/> | ChIP-seq               |
| <input checked="" type="checkbox"/> | <input type="checkbox"/>            | Flow cytometry         |
| <input checked="" type="checkbox"/> | <input type="checkbox"/>            | MRI-based neuroimaging |

## Antibodies

## Antibodies used

Mouse monoclonal anti-V5\_Thermo Fisher Scientific\_Cat# R960-25\_RRID:AB\_2556564\_1:5000 dilution  
 Rabbit polyclonal anti- $\beta$ 3-TUBULIN\_Sigma\_Cat# T2200\_RRID:AB\_262133\_1:2000 dilution.  
 Sheep polyclonal anti-EBF2\_R&D systems\_Cat# AF7006\_RRID:AB\_10972102\_5 ug for ChIP  
 Sheep polyclonal anti-ONECUT2\_R&D systems\_Cat# AF6294\_RRID:AB\_10640365\_5 ug for ChIP  
 Goat polyclonal anti-NGN2\_Santa Cruz\_Cat# SC-19233\_RRID:AB\_2149513\_5 ug for ChIP  
 Rabbit polyclonal anti-MASH1 (Ascl1)\_abcam\_Cat# ab74065\_RRID:AB\_1859937\_5 ug for ChIP  
 Rabbit polyclonal anti-HA\_abcam\_Cat# ab9110\_RRID:AB\_307019\_1:5000 dilution  
 Mouse monoclonal anti-FLAG\_Sigma\_Cat# F1804\_RRID:AB\_262044\_1:500 dilution  
 Chicken polyclonal anti-MAP2\_abcam\_Cat# ab5392\_RRID:AB\_2138153\_1:1000 dilution  
 Mouse monoclonal anti-NEUROFILAMENT\_DSHB\_Cat# 2H3\_RRID:AB\_531793\_1:1000 dilution  
 Goat polyclonal anti-BRN2\_Santa Cruz\_Cat# SC-6029\_RRID: AB\_2167385\_5 ug for ChIP  
 Rabbit polyclonal anti-H3K27ac\_abcam\_Cat# ab4729\_RRID:AB\_2118291\_5 ug for ChIP  
 Goat anti-chicken 488 AlexaFluor\_Invitrogen\_Cat# A-11039\_RRID:AB\_142924\_1:1000 dilution  
 Goat anti-mouse 647 Alexa Fluor\_Invitrogen\_Cat# A-21236\_RRID:AB\_141725\_1:1000 dilution  
 Goat anti-rabbit 568 Alexa Fluor\_Invitrogen\_Cat# A-11036\_RRID:AB\_143011\_1:1000 dilution

## Validation

Antibodies are validated by using uninduced (mouse embryonic stem cells) cells as negative controls and comparison of the antibody staining/ChIP with the ones performed with tagged proteins. Additional validation and reports from the manufacturer and peer-reviewed articles can be found on manufacturer's websites.

## Eukaryotic cell lines

## Policy information about cell lines

## Cell line source(s)

Inducible cell lines were generated using the inducible cassette exchange (ICE) method that was previously described in Iacovino, M. et al. Inducible cassette exchange: a rapid and efficient system enabling conditional gene expression in embryonic stem and primary cells. Stem Cells 29, 1580–1588 (2011).

## Authentication

We genotyped the cell lines.

## Mycoplasma contamination

These cell lines used in the study were not tested for mycoplasma. However, the parental cell line that was used to generate these inducible lines are routinely checked in the lab and have not been found positive for mycoplasma.

Commonly misidentified lines  
(See [ICLAC](#) register)

None of the lines used were misidentified.

## ChIP-seq

## Data deposition

- Confirm that both raw and final processed data have been deposited in a public database such as [GEO](#).
- Confirm that you have deposited or provided access to graph files (e.g. BED files) for the called peaks.

## Data access links

*May remain private before publication.*

To review GEO accession GSE114176: <https://www.ncbi.nlm.nih.gov/geo/query/acc.cgi?acc=GSE114176>

## Files in database submission

HL7T3BGXY\_n01\_ba48.fastq.gz  
 HL7T3BGXY\_n01\_ba49.fastq.gz  
 HFW7KBGXY\_n01\_ba63.fastq.gz  
 HJY7YBGX2\_n01\_ba65.fastq.gz  
 C7KY3ACXX\_l08n01\_sv106.35100000040810.fastq.gz  
 C7KY3ACXX\_l08n01\_sv107.35100000040897.fastq.gz  
 HFW7KBGXY\_n01\_ba64.fastq.gz  
 C7KY3ACXX\_l08n01\_sv110.351000000409f3.fastq.gz  
 HJY7YBGX2\_n01\_ba77.fastq.gz  
 HJY7YBGX2\_n01\_ba78.fastq.gz

HJY7YBGX2\_n01\_ba76.fastq.gz  
 bgm3\_ACAGTG\_L002\_R1\_001.fastq.gz  
 C5WCJACXX\_l06n01\_bgm6.341000000bfd5.fastq.gz  
 H7KNHBGX3\_n01\_ba83.fastq.gz  
 H7KNHBGX3\_n01\_ba84.fastq.gz  
 H3FWTBGX5\_n01\_ba126.fastq.gz  
 H3FWTBGX5\_n01\_ba127.fastq.gz  
 HL7T3BGXY\_n01\_ba50.fastq.gz  
 HFW7KBGXY\_n01\_ba59.fastq.gz  
 H3FWTBGX5\_n01\_ba128.fastq.gz  
 H3FWTBGX5\_n01\_ba129.fastq.gz  
 H7KNHBGX3\_n01\_ba67.fastq.gz  
 HL2NTBGX3\_n01\_ba108.fastq.gz  
 H7KNHBGX3\_n01\_ba85.fastq.gz  
 HL2NTBGX3\_n01\_ba107.fastq.gz  
 H3FWTBGX5\_n01\_ba130.fastq.gz  
 H3FWTBGX5\_n01\_ba131.fastq.gz  
 HL7T3BGXY\_n01\_ba51.fastq.gz  
 HFW7KBGXY\_n01\_ba61.fastq.gz  
 H3FWTBGX5\_n01\_ba133.fastq.gz  
 H3FWTBGX5\_n01\_ba134.fastq.gz

Genome browser session  
 (e.g. [UCSC](#))

*Provide a link to an anonymized genome browser session for "Initial submission" and "Revised version" documents only, to enable peer review. Write "no longer applicable" for "Final submission" documents.*

## Methodology

Replicates

12h Ascl1 and Neurog2 ChIP-seq experiments were performed in 3 biological replicates. Rest of the ChIP-seq experiments are performed in 2 biological replicates.

Sequencing depth

| File(s)                                        | Read length | Paired or single-end seq | Sequenced reads | Uniquely mapped reads |
|------------------------------------------------|-------------|--------------------------|-----------------|-----------------------|
| HL7T3BGXY_n01_ba48.fastq.gz                    | 51          | single                   | 41214096        | 30324495              |
| HL7T3BGXY_n01_ba49.fastq.gz                    | 51          | single                   | 37113165        | 27261442              |
| HFW7KBGXY_n01_ba63.fastq.gz                    | 76          | single                   | 34172197        | 26232594              |
| HJY7YBGX2_n01_ba65.fastq.gz                    | 50          | single                   | 47389148        | 26908039              |
| C7KY3ACXX_l08n01_sv106.35100000040810.fastq.gz | 51          | single                   | 42745488        | 32304763              |
| C7KY3ACXX_l08n01_sv107.35100000040897.fastq.gz | 51          | single                   | 60891637        | 34923424              |
| HFW7KBGXY_n01_ba64.fastq.gz                    | 76          | single                   | 32221513        | 25339660              |
| C7KY3ACXX_l08n01_sv110.351000000409f3.fastq.gz | 51          | single                   | 21141657        | 15391085              |
| HJY7YBGX2_n01_ba77.fastq.gz                    | 50          | single                   | 47382123        | 36758251              |
| HJY7YBGX2_n01_ba78.fastq.gz                    | 50          | single                   | 41435336        | 33111788              |
| HJY7YBGX2_n01_ba76.fastq.gz                    | 50          | single                   | 33191686        | 26401326              |
| bgm3_ACAGTG_L002_R1_001.fastq.gz               | 51          | single                   | 29254740        | 22068673              |
| C5WCJACXX_l06n01_bgm6.341000000bfd5.fastq.gz   | 51          | single                   | 52494545        | 39539853              |
| H7KNHBGX3_n01_ba83.fastq.gz                    | 75          | single                   | 39374378        | 30086226              |
| H7KNHBGX3_n01_ba84.fastq.gz                    | 75          | single                   | 40159227        | 30518273              |
| H3FWTBGX5_n01_ba126.fastq.gz                   | 75          | single                   | 35918702        | 29038259              |
| H3FWTBGX5_n01_ba127.fastq.gz                   | 75          | single                   | 29446502        | 22765267              |
| HL7T3BGXY_n01_ba50.fastq.gz                    | 51          | single                   | 30042940        | 25695212              |
| HFW7KBGXY_n01_ba59.fastq.gz                    | 76          | single                   | 22333815        | 18954309              |
| H3FWTBGX5_n01_ba128.fastq.gz                   | 75          | single                   | 33047029        | 26099022              |
| H3FWTBGX5_n01_ba129.fastq.gz                   | 75          | single                   | 35249661        | 26716434              |
| H7KNHBGX3_n01_ba67.fastq.gz                    | 75          | single                   | 35428163        | 28605942              |
| HL2NTBGX3_n01_ba108.fastq.gz                   | 75          | single                   | 33487953        | 26778366              |
| H7KNHBGX3_n01_ba85.fastq.gz                    | 75          | single                   | 44875183        | 34995379              |
| HL2NTBGX3_n01_ba107.fastq.gz                   | 75          | single                   | 39157095        | 29516002              |
| H3FWTBGX5_n01_ba130.fastq.gz                   | 75          | single                   | 36018293        | 28555170              |
| H3FWTBGX5_n01_ba131.fastq.gz                   | 75          | single                   | 26957572        | 23011879              |
| HL7T3BGXY_n01_ba51.fastq.gz                    | 51          | single                   | 34287101        | 29026034              |
| HFW7KBGXY_n01_ba61.fastq.gz                    | 76          | single                   | 37968301        | 32408097              |
| H3FWTBGX5_n01_ba133.fastq.gz                   | 75          | single                   | 33712513        | 25428696              |
| H3FWTBGX5_n01_ba134.fastq.gz                   | 75          | single                   | 37727645        | 30308287              |

Antibodies

anti-Ascl1 (abcam, ab74065), anti-Neurog2 (Santa Cruz, SC-19233), anti-HA (abcam, ab9110) anti-Brn2 (Santa Cruz, SC-6029), anti-Ebf2 (R&D, AF7006), anti-Onecut2 (R&D, AF6294), anti-H3K27ac (abcam, ab4729)

Peak calling parameters

All ChIP-seq fastq files were aligned to the mouse genome (version mm10) using Bowtie (1.0.1) with options “-q --best --strata -m 1 --chunkmbs 1024”. Only uniquely mapped reads were considered for further analysis. MultiGPS was used to define transcription factor DNA binding events. A q-value cutoff of 0.01 (assessed using binomial tests and Benjamini-Hochberg multiple hypothesis test correction), was used to call statistically significant binding events. Differential binding analysis between time points (12hr vs 48hr) or factor inductions (iAscl1 vs iNeurog2) was also performed using MultiGPS, which calls EdgeR internally. Differentially bound sites are defined as those that display significantly greater read enrichment levels (minimum 1.5-fold, q-value < 0.05) as determined by EdgeR’s negative binomial generalized linear models applied to MultiGPS’ per-replicate count data (TMM normalized). Shared binding events are defined as those that are called in both conditions, and not displaying significant differences in read enrichment level. To account for some differences in the

numbers of peaks called for Neurog2 and Ascl1, some analyses of differential and shared binding restrict analysis to the top 10,000 most CHIP-enriched binding events for each of those transcription factors.

Data quality

We assessed the quality of the sequencing reads using FastQC and assessed library complexity using custom scripts

Software

SeqUnwinder Kakumanu et al., 2017  
ChIPEnrich Welch et al., 2014  
MultiGPS Mahony et al., 2014
